# Supplementary material
Source: Royal Society of Chemistry journal article supplement (doi:10.1039/d5ma01038a)

## Supporting Information

### Development of Organic-Inorganic Hybrid Coatings with Silica Nanoparticles, Biopolymer, and Clay for Onion Seeds: Multifunctional Strategy for Controlling White Rot

Lorena Alves de Melo Bessa,<sup>\*a</sup> Franciely J. A. Carmargos,<sup>a</sup> Amanda M. Oliveira,<sup>a</sup> Celly Mieke Shinohara Izumi,<sup>b</sup> Everaldo A. Lopes,<sup>a</sup> Eduardo Alves,<sup>c</sup> Eduardo Seiti Gomide Mizubuti,<sup>d</sup> and Jairo Tronto<sup>a</sup>.

<sup>a</sup> Instituto de Ciências Exatas e Tecnológicas, Universidade Federal de Viçosa, Campus Rio Paranaíba, CEP 38810-000, Rio Paranaíba, MG, Brazil.

<sup>b</sup> Departamento de Química, Instituto de Ciências Exatas, Universidade Federal de Juiz de Fora, Campus Univeritário, CEP 36036-900, Juiz de Fora, MG, Brazil.

<sup>c</sup> Departamento de Fitopatologia, Universidade Federal de Lavras, Lavras, CEP 37200-900, MG, Brazil.

<sup>d</sup> Departamento de Fitopatologia, Universidade Federal de Viçosa, Campus Viçosa, CEP 36570-900 Viçosa, MG, Brazil.

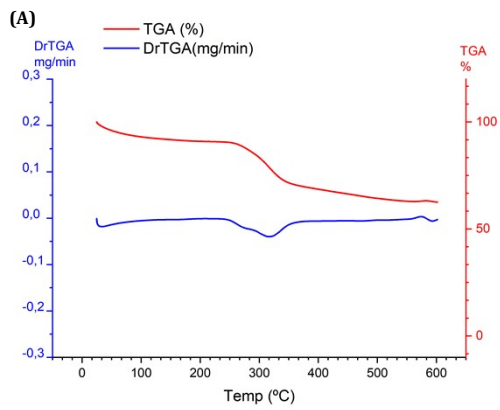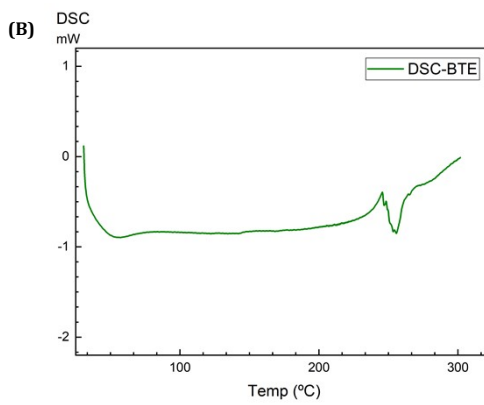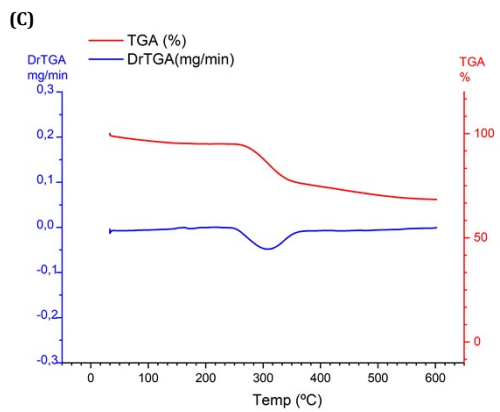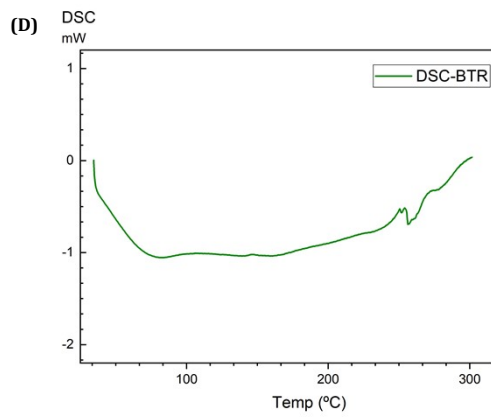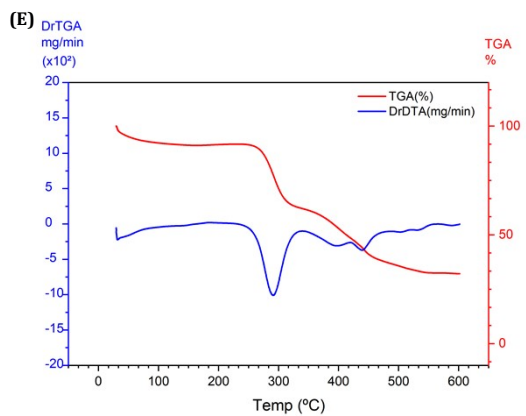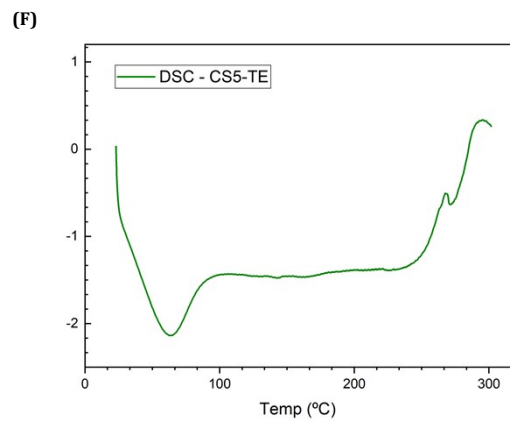

**(G)**

(H)

**Figure S1: (A)** TG-DTG – BTE; **(B)** DSC – BTE; **(C)** TG-DTG – BTR; **(D)** DSC – BTR; **(E)** TG-DTG – CS5-TE; **(F)** DSC – CS5-TE; **(G)** TG-DTG – CS5-TR; **(H)** DSC – CS5-TR.

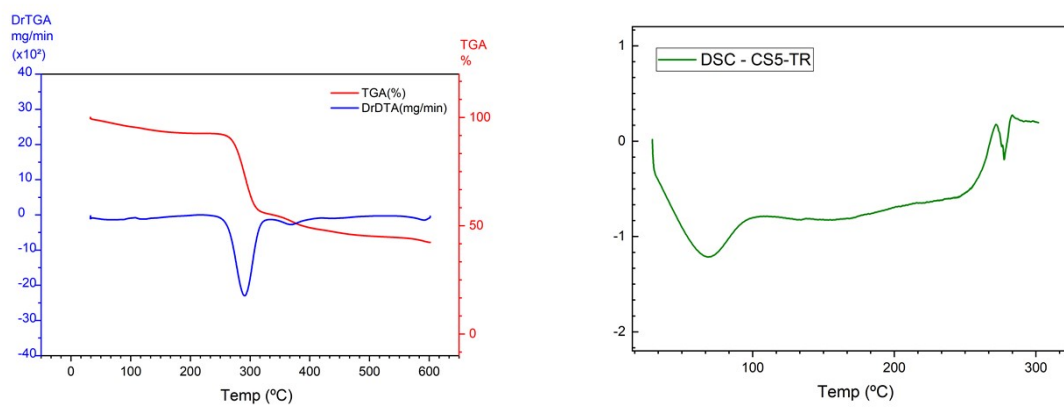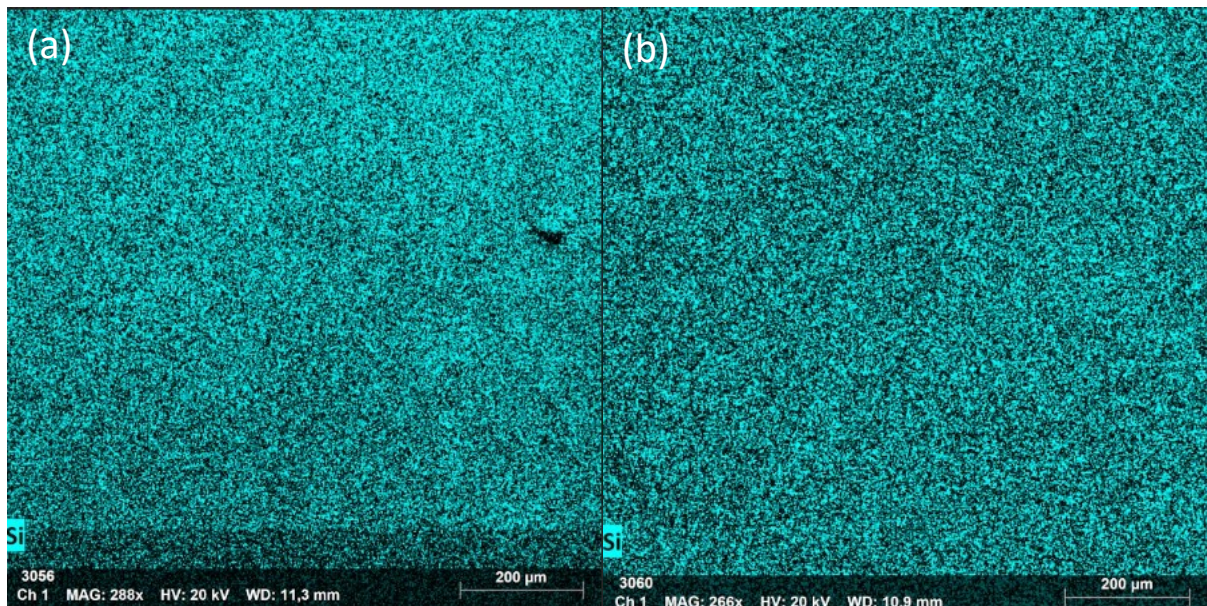

**Figure S2: Silicon elemental maps of (a) - BTE (b) - BTR.**

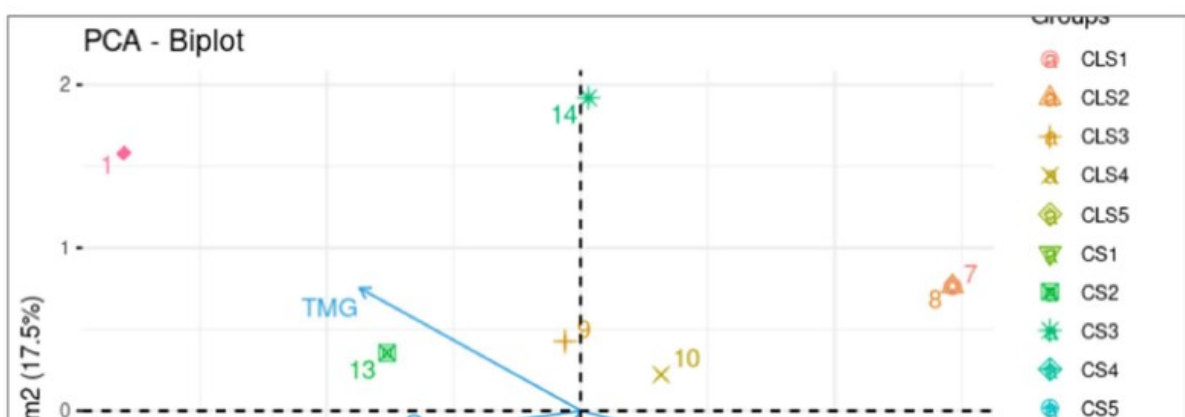

**Figure S3:** Multivariate principal component analysis (PCA) of the parameters of germination percentage (G), mean germination speed (VMG), germination speed index (IVG), and mean germination time (TMG) for the seed coatings of onion *Allium cepa* L.

**Table S1** Descriptive statistical analysis of germination parameters.

| Germination parameters | G (%) | IVG (day <sup>-1</sup> ) | TMG (days) | VMG   |
|------------------------|-------|--------------------------|------------|-------|
| Control                | 85.0  | 2.83                     | 10.2       | 0.098 |
| LS1                    | 80.0  | 2.67                     | 9.6        | 0.104 |
| LS2                    | 85.0  | 2.67                     | 10.2       | 0.098 |
| LS3                    | 85.0  | 2.83                     | 10.2       | 0.098 |
| LS4                    | 75.0  | 2.33                     | 9.0        | 0.111 |
| LS5                    | 90.0  | 3.00                     | 10.8       | 0.093 |
| CLS1                   | 75.0  | 1.83                     | 9.0        | 0.111 |
| CLS2                   | 75.0  | 1.83                     | 9.0        | 0.111 |
| CLS3                   | 90.0  | 2.33                     | 10.8       | 0.093 |
| CLS4                   | 85.0  | 2.33                     | 10.2       | 0.098 |
| CLS5                   | 85.0  | 2.50                     | 10.2       | 0.098 |
| CS1                    | 95.0  | 2.67                     | 11.4       | 0.088 |
| CS2                    | 100.0 | 2.50                     | 12.0       | 0.083 |
| CS3                    | 95.0  | 1.67                     | 11.4       | 0.088 |
| CS4                    | 95.0  | 3.00                     | 11.4       | 0.088 |
| CS5                    | 95.0  | 2.83                     | 11.4       | 0.088 |
| L1 - LAP               | 90.0  | 2.83                     | 10.8       | 0.093 |
| L1-CMC                 | 95.0  | 2.67                     | 11.4       | 0.088 |

|                    |      |      |      |       |
|--------------------|------|------|------|-------|
| Medium             | 87.7 | 2.50 | 10.5 | 0.096 |
| Standard deviation | 7.9  | 0.95 | 0.4  | 0.009 |
| CV (%)             | 9.1  | 9.05 | 16.2 | 9.290 |

---

**Figure S4:** Plates containing *S. cepivora* mycelial discs and dried films CS5-TE and CS5-TR after 135 of experimentation.

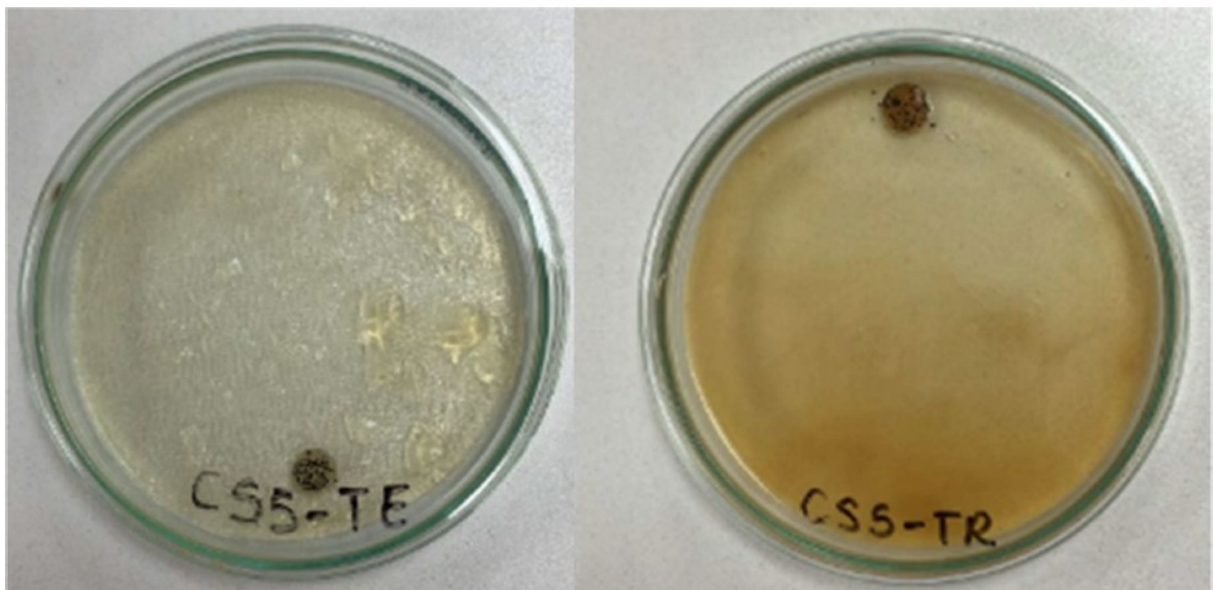

Supplement: d5ma01038a1.pdf [file d5ma01038a1.pdf]
